# Supplementary material
Source: ML conference proceedings conference paper supplement (https://openaccess.thecvf.com/content/CVPR2026/html/Wang_Authorize-on-Demand_Dynamic_Authorization_CVPR_2026_paper.html)
Supplement: Supplementary file 1 [file Wang_Authorize-on-Demand_Dynamic_Authorization_CVPR_2026_supplemental.pdf]

**Supplementary Materials:**  
**Authorize-on-Demand: Dynamic Authorization with Domain-Aware Intellectual  
Property Protection for VLMs**

Table 1: The accuracy (%) of target-specified NTL on Office-31. The vertical/horizontal axis denotes the authorized/unauthorized domain. In each task, the left of '⇒' shows the test accuracy of SL-CLIP on the unauthorized domain, while the right side presents the accuracy of NTL.

| Authorized/Unauthorized | Amazon      | Dslr        | Webcam      | $W_{u-a} \uparrow$ | $Drop_u \uparrow$ | $Drop_a \downarrow$ |
|-------------------------|-------------|-------------|-------------|--------------------|-------------------|---------------------|
| Amazon                  | 79.4 ⇒ 77.6 | 87.5 ⇒ 10.0 | 88.8 ⇒ 17.5 | 56.34              | 74.40             | 1.80                |
| Dslr                    | 83.8 ⇒ 10.0 | 95.7 ⇒ 94.4 | 98.8 ⇒ 8.8  | 76.09              | 81.90             | 1.30                |
| Webcam                  | 80.0 ⇒ 3.8  | 92.5 ⇒ 91.3 | 94.4 ⇒ 91.3 | 32.50              | 38.70             | 3.10                |
| Mean                    | /           |             |             | 54.98              | 65.00             | 2.07                |

Table 2: The accuracy (%) of target-specified CUTI-Domain on Office-31. The vertical/horizontal axis denotes the authorized/unauthorized domain. In each task, the left of '⇒' shows the test accuracy of SL-CLIP on the unauthorized domain, while the right side presents the accuracy of CUTI-Domain.

| Authorized/Unauthorized | Amazon      | Dslr        | Webcam      | $W_{u-a} \uparrow$ | $Drop_u \uparrow$ | $Drop_a \downarrow$ |
|-------------------------|-------------|-------------|-------------|--------------------|-------------------|---------------------|
| Amazon                  | 79.4 ⇒ 78.8 | 87.5 ⇒ 6.3  | 88.8 ⇒ 11.3 | 62.06              | 79.35             | 0.60                |
| Dslr                    | 83.8 ⇒ 5.0  | 95.7 ⇒ 95.0 | 98.8 ⇒ 7.5  | 80.13              | 85.05             | 0.70                |
| Webcam                  | 80.0 ⇒ 1.3  | 92.5 ⇒ 2.5  | 94.4 ⇒ 91.9 | 75.24              | 84.38             | 2.50                |
| Mean                    | /           |             |             | 72.48              | 82.93             | 1.27                |

Table 3: The accuracy (%) of target-specified CUPI-Domain on Office-31. The vertical/horizontal axis denotes the authorized/unauthorized domain. In each task, the left of '⇒' shows the test accuracy of SL-CLIP on the unauthorized domain, while the right side presents the accuracy of CUPI-Domain.

| Authorized/Unauthorized | Amazon      | Dslr        | Webcam      | $W_{u-a} \uparrow$ | $Drop_u \uparrow$ | $Drop_a \downarrow$ |
|-------------------------|-------------|-------------|-------------|--------------------|-------------------|---------------------|
| Amazon                  | 79.4 ⇒ 78.9 | 87.5 ⇒ 5.2  | 88.8 ⇒ 10.7 | 62.88              | 80.20             | 0.50                |
| Dslr                    | 83.8 ⇒ 4.3  | 95.7 ⇒ 95.0 | 98.8 ⇒ 6.9  | 80.75              | 85.70             | 0.70                |
| Webcam                  | 80.0 ⇒ 0.9  | 92.5 ⇒ 2.5  | 94.4 ⇒ 92.9 | 77.15              | 84.55             | 1.50                |
| Mean                    | /           |             |             | 73.60              | 83.48             | 0.90                |

Table 4: The accuracy (%) of target-specified HNTL on Office-31. The vertical/horizontal axis denotes the authorized/unauthorized domain. In each task, the left of ' $\Rightarrow$ ' shows the test accuracy of SL-CLIP on the unauthorized domain, while the right side presents the accuracy of HNTL.

| Authorized/Unauthorized | Amazon                  | Dslr                    | Webcam                  | $W_{u-a} \uparrow$ | $Drop_u \uparrow$ | $Drop_a \downarrow$ |
|-------------------------|-------------------------|-------------------------|-------------------------|--------------------|-------------------|---------------------|
| Amazon                  | 79.4 $\Rightarrow$ 74.2 | 87.5 $\Rightarrow$ 12.5 | 88.8 $\Rightarrow$ 3.1  | 55.76              | 80.35             | 5.20                |
| Dslr                    | 83.8 $\Rightarrow$ 3.1  | 95.7 $\Rightarrow$ 94.6 | 98.8 $\Rightarrow$ 2.1  | 82.87              | 88.70             | 1.10                |
| Webcam                  | 80.0 $\Rightarrow$ 6.3  | 92.5 $\Rightarrow$ 3.1  | 94.4 $\Rightarrow$ 90.6 | 70.44              | 81.55             | 3.80                |
| Mean                    | /                       |                         |                         | 69.69              | 83.53             | 3.37                |

Table 5: The accuracy (%) of target-specified SOPHON on Office-31. The vertical/horizontal axis denotes the authorized/unauthorized domain. In each task, the left of ' $\Rightarrow$ ' shows the test accuracy of SL-CLIP on the unauthorized domain, while the right side presents the accuracy of SOPHON.

| Authorized/Unauthorized | Amazon                  | Dslr                    | Webcam                  | $W_{u-a} \uparrow$ | $Drop_u \uparrow$ | $Drop_a \downarrow$ |
|-------------------------|-------------------------|-------------------------|-------------------------|--------------------|-------------------|---------------------|
| Amazon                  | 79.4 $\Rightarrow$ 75.0 | 87.5 $\Rightarrow$ 2.5  | 88.8 $\Rightarrow$ 5.0  | 60.00              | 84.40             | 4.40                |
| Dslr                    | 83.8 $\Rightarrow$ 3.8  | 95.7 $\Rightarrow$ 94.4 | 98.8 $\Rightarrow$ 5.0  | 80.81              | 86.90             | 1.30                |
| Webcam                  | 80.0 $\Rightarrow$ 2.5  | 92.5 $\Rightarrow$ 2.5  | 94.4 $\Rightarrow$ 93.4 | 77.20              | 83.75             | 1.05                |
| Mean                    | /                       |                         |                         | 72.67              | 85.02             | 2.25                |

Table 6: The accuracy (%) of target-specified IP-CLIP on Office-31. The vertical/horizontal axis denotes the authorized/unauthorized domain. In each task, the left of ' $\Rightarrow$ ' shows the test accuracy of SL-CLIP on the unauthorized domain, while the right side presents the accuracy of IP-CLIP.

| Authorized/Unauthorized | Amazon                  | Dslr                    | Webcam                  | $W_{u-a} \uparrow$ | $Drop_u \uparrow$ | $Drop_a \downarrow$ |
|-------------------------|-------------------------|-------------------------|-------------------------|--------------------|-------------------|---------------------|
| Amazon                  | 79.4 $\Rightarrow$ 79.4 | 87.5 $\Rightarrow$ 7.5  | 88.8 $\Rightarrow$ 8.8  | 63.52              | 80.00             | 0.00                |
| Dslr                    | 83.8 $\Rightarrow$ 3.8  | 95.7 $\Rightarrow$ 95.7 | 98.8 $\Rightarrow$ 6.3  | 82.54              | 86.25             | 0.00                |
| Webcam                  | 80.0 $\Rightarrow$ 3.8  | 92.5 $\Rightarrow$ 2.5  | 94.4 $\Rightarrow$ 94.4 | 78.45              | 83.10             | 0.00                |
| Mean                    | /                       |                         |                         | 74.84              | 83.12             | 0.00                |

Table 7: The accuracy (%) of target-specified AoD-IP on Office-31. The vertical/horizontal axis denotes the authorized/unauthorized domain. In each task, the left of '⇒' shows the test accuracy of SL-CLIP on the unauthorized domain, while the right side presents the accuracy of AoD-IP.

| Authorized/Unauthorized | Amazon      | Dslr        | Webcam      | $W_{u-a} \uparrow$ | $Drop_u \uparrow$ | $Drop_a \downarrow$ |
|-------------------------|-------------|-------------|-------------|--------------------|-------------------|---------------------|
| Amazon                  | 79.4 ⇒ 79.4 | 87.5 ⇒ 0.0  | 88.8 ⇒ 0.0  | 69.98              | 88.15             | 0.00                |
| Dslr                    | 83.8 ⇒ 0.6  | 95.7 ⇒ 95.7 | 98.8 ⇒ 1.3  | 86.43              | 90.36             | 0.00                |
| Webcam                  | 80.0 ⇒ 0.0  | 92.5 ⇒ 0.0  | 94.4 ⇒ 94.4 | 81.40              | 86.25             | 0.00                |
| Mean                    | /           |             |             | 79.27              | 88.25             | 0.00                |

Table 8: The accuracy (%) of target-specified NTL on Office-Home-65. The vertical/horizontal axis denotes the authorized/unauthorized domain. In each task, the left of '⇒' shows the test accuracy of SL-CLIP on the unauthorized domain, while the right side presents the accuracy of NTL.

| Authorized/Unauthorized | Art         | Clipart     | Product     | Real-World  | $W_{u-a} \uparrow$ | $Drop_u \uparrow$ | $Drop_a \downarrow$ |
|-------------------------|-------------|-------------|-------------|-------------|--------------------|-------------------|---------------------|
| Art                     | 85.5 ⇒ 85.4 | 68.0 ⇒ 23.8 | 89.8 ⇒ 86.5 | 88.5 ⇒ 88.5 | 13.44              | 15.83             | 0.10                |
| Clipart                 | 81.0 ⇒ 18.3 | 75.0 ⇒ 74.7 | 90.8 ⇒ 15.0 | 89.5 ⇒ 31.0 | 48.83              | 65.67             | 0.30                |
| Product                 | 78.8 ⇒ 11.0 | 73.3 ⇒ 13.8 | 92.8 ⇒ 92.8 | 87.5 ⇒ 85.8 | 39.90              | 43.00             | 0.00                |
| Real-World              | 83.0 ⇒ 80.8 | 71.3 ⇒ 7.8  | 90.8 ⇒ 52.5 | 90.0 ⇒ 88.1 | 28.87              | 34.67             | 1.90                |
| Mean                    | /           |             |             |             | 32.76              | 39.79             | 0.57                |

Table 9: The accuracy (%) of target-specified CUTI-Domain on Office-Home-65. The vertical/horizontal axis denotes the authorized/unauthorized domain. In each task, the left of '⇒' shows the test accuracy of SL-CLIP on the unauthorized domain, while the right side presents the accuracy of CUTI-Domain.

| Authorized/Unauthorized | Art         | Clipart     | Product     | Real-World  | $W_{u-a} \uparrow$ | $Drop_u \uparrow$ | $Drop_a \downarrow$ |
|-------------------------|-------------|-------------|-------------|-------------|--------------------|-------------------|---------------------|
| Art                     | 85.5 ⇒ 82.5 | 68.0 ⇒ 16.8 | 89.8 ⇒ 21.3 | 88.5 ⇒ 48.0 | 41.58              | 53.40             | 3.00                |
| Clipart                 | 81.0 ⇒ 15.8 | 75.0 ⇒ 75.0 | 90.8 ⇒ 9.0  | 89.5 ⇒ 19.3 | 53.37              | 72.40             | 0.63                |
| Product                 | 78.8 ⇒ 16.3 | 73.3 ⇒ 10.8 | 92.8 ⇒ 92.4 | 87.5 ⇒ 27.0 | 56.82              | 61.83             | 0.37                |
| Real-World              | 83.0 ⇒ 30.3 | 71.3 ⇒ 10.0 | 90.8 ⇒ 32.8 | 90.0 ⇒ 88.5 | 49.41              | 57.33             | 1.50                |
| Mean                    | /           |             |             |             | 50.29              | 61.24             | 1.38                |

Table 10: The accuracy (%) of target-specified CUPI-Domain on Office-Home-65. The vertical/horizontal axis denotes the authorized/unauthorized domain. In each task, the left of ' $\Rightarrow$ ' shows the test accuracy of SL-CLIP on the unauthorized domain, while the right side presents the accuracy of CUPI-Domain.

| Authorized/Unauthorized | Art                     | Clipart                 | Product                 | Real-World              | $W_{u-a}$ $\uparrow$ | $Drop_u$ $\uparrow$ | $Drop_a$ $\downarrow$ |
|-------------------------|-------------------------|-------------------------|-------------------------|-------------------------|----------------------|---------------------|-----------------------|
| Art                     | 85.5 $\Rightarrow$ 83.4 | 68.0 $\Rightarrow$ 13.0 | 89.8 $\Rightarrow$ 21.0 | 88.5 $\Rightarrow$ 47.3 | 44.12                | 55.00               | 2.10                  |
| Clipart                 | 81.0 $\Rightarrow$ 15.0 | 75.0 $\Rightarrow$ 74.9 | 90.8 $\Rightarrow$ 10.0 | 89.5 $\Rightarrow$ 16.1 | 54.90                | 73.40               | 0.10                  |
| Product                 | 78.8 $\Rightarrow$ 15.9 | 73.3 $\Rightarrow$ 9.8  | 92.8 $\Rightarrow$ 92.5 | 87.5 $\Rightarrow$ 25.1 | 57.94                | 62.93               | 0.30                  |
| Real-World              | 83.0 $\Rightarrow$ 25.4 | 71.3 $\Rightarrow$ 10.0 | 90.8 $\Rightarrow$ 26.7 | 90.0 $\Rightarrow$ 89.5 | 54.15                | 61.00               | 0.50                  |
| Mean                    | /                       |                         |                         |                         | 52.78                | 63.08               | 0.75                  |

Table 11: The accuracy (%) of target-specified HNTL on Office-Home-65. The vertical/horizontal axis denotes the authorized/unauthorized domain. In each task, the left of ' $\Rightarrow$ ' shows the test accuracy of SL-CLIP on the unauthorized domain, while the right side presents the accuracy of HNTL.

| Authorized/Unauthorized | Art                     | Clipart                 | Product                 | Real-World              | $W_{u-a}$ $\uparrow$ | $Drop_u$ $\uparrow$ | $Drop_a$ $\downarrow$ |
|-------------------------|-------------------------|-------------------------|-------------------------|-------------------------|----------------------|---------------------|-----------------------|
| Art                     | 85.5 $\Rightarrow$ 70.1 | 68.0 $\Rightarrow$ 4.1  | 89.8 $\Rightarrow$ 7.0  | 88.5 $\Rightarrow$ 22.9 | 38.81                | 70.77               | 15.40                 |
| Clipart                 | 81.0 $\Rightarrow$ 5.5  | 75.0 $\Rightarrow$ 46.2 | 90.8 $\Rightarrow$ 5.2  | 89.5 $\Rightarrow$ 9.1  | 23.85                | 80.50               | 28.83                 |
| Product                 | 78.8 $\Rightarrow$ 4.7  | 73.3 $\Rightarrow$ 5.7  | 92.8 $\Rightarrow$ 70.7 | 87.5 $\Rightarrow$ 27.3 | 31.96                | 67.30               | 22.10                 |
| Real-World              | 83.0 $\Rightarrow$ 35.9 | 71.3 $\Rightarrow$ 6.2  | 90.8 $\Rightarrow$ 26.6 | 90.0 $\Rightarrow$ 78.8 | 37.51                | 58.80               | 11.20                 |
| Mean                    | /                       |                         |                         |                         | 33.03                | 69.34               | 19.38                 |

Table 12: The accuracy (%) of target-specified SOPHON on Office-Home-65. The vertical/horizontal axis denotes the authorized/unauthorized domain. In each task, the left of ' $\Rightarrow$ ' shows the test accuracy of SL-CLIP on the unauthorized domain, while the right side presents the accuracy of SOPHON.

| Authorized/Unauthorized | Art                     | Clipart                 | Product                 | Real-World              | $W_{u-a}$ $\uparrow$ | $Drop_u$ $\uparrow$ | $Drop_a$ $\downarrow$ |
|-------------------------|-------------------------|-------------------------|-------------------------|-------------------------|----------------------|---------------------|-----------------------|
| Art                     | 85.5 $\Rightarrow$ 73.1 | 68.0 $\Rightarrow$ 21.5 | 89.8 $\Rightarrow$ 45.8 | 88.5 $\Rightarrow$ 64.0 | 18.99                | 38.33               | 12.37                 |
| Clipart                 | 81.0 $\Rightarrow$ 13.5 | 75.0 $\Rightarrow$ 74.5 | 90.8 $\Rightarrow$ 21.2 | 89.5 $\Rightarrow$ 22.0 | 50.44                | 68.20               | 0.50                  |
| Product                 | 78.8 $\Rightarrow$ 29.2 | 73.3 $\Rightarrow$ 18.2 | 92.8 $\Rightarrow$ 89.0 | 87.5 $\Rightarrow$ 58.5 | 36.28                | 44.57               | 3.80                  |
| Real-World              | 83.0 $\Rightarrow$ 51.5 | 71.3 $\Rightarrow$ 24.0 | 90.8 $\Rightarrow$ 61.3 | 90.0 $\Rightarrow$ 80.5 | 21.38                | 36.10               | 9.53                  |
| Mean                    | /                       |                         |                         |                         | 31.77                | 46.80               | 6.55                  |

Table 13: The accuracy (%) of target-specified IP-CLIP on Office-Home-65. The vertical/horizontal axis denotes the authorized/unauthorized domain. In each task, the left of ' $\Rightarrow$ ' shows the test accuracy of SL-CLIP on the unauthorized domain, while the right side presents the accuracy of IP-CLIP.

| Authorized/Unauthorized | Art                     | Clipart                 | Product                 | Real-World              | $W_{u-a} \uparrow$ | $Drop_u \uparrow$ | $Drop_a \downarrow$ |
|-------------------------|-------------------------|-------------------------|-------------------------|-------------------------|--------------------|-------------------|---------------------|
| Art                     | 85.5 $\Rightarrow$ 85.2 | 68.0 $\Rightarrow$ 12.8 | 89.8 $\Rightarrow$ 15.0 | 88.5 $\Rightarrow$ 34.5 | 52.00              | 61.33             | 0.30                |
| Clipart                 | 81.0 $\Rightarrow$ 11.8 | 75.0 $\Rightarrow$ 74.9 | 90.8 $\Rightarrow$ 5.3  | 89.5 $\Rightarrow$ 17.8 | 56.45              | 75.47             | 0.10                |
| Product                 | 78.8 $\Rightarrow$ 14.0 | 73.3 $\Rightarrow$ 8.5  | 92.8 $\Rightarrow$ 92.5 | 87.5 $\Rightarrow$ 25.8 | 58.71              | 63.77             | 0.30                |
| Real-World              | 83.0 $\Rightarrow$ 30.3 | 71.3 $\Rightarrow$ 7.5  | 90.8 $\Rightarrow$ 29.3 | 90.0 $\Rightarrow$ 89.9 | 53.25              | 59.33             | 0.10                |
| Mean                    | /                       |                         |                         |                         | 55.10              | 64.98             | 0.20                |

Table 14: The accuracy (%) of target-specified NTL on Mini-DomainNet. The vertical/horizontal axis denotes the authorized/unauthorized domain. In each task, the left of ' $\Rightarrow$ ' shows the test accuracy of SL-CLIP on the unauthorized domain, while the right side presents the accuracy of NTL.

| Authorized/Unauthorized | Clipart                 | Painting                | Real                    | Sketch                  | $W_{u-a} \uparrow$ | $Drop_u \uparrow$ | $Drop_a \downarrow$ |
|-------------------------|-------------------------|-------------------------|-------------------------|-------------------------|--------------------|-------------------|---------------------|
| Clipart                 | 85.1 $\Rightarrow$ 84.5 | 79.8 $\Rightarrow$ 33.3 | 89.8 $\Rightarrow$ 34.0 | 78.7 $\Rightarrow$ 42.1 | 38.62              | 46.30             | 0.60                |
| Painting                | 83.8 $\Rightarrow$ 11.9 | 81.4 $\Rightarrow$ 79.8 | 89.1 $\Rightarrow$ 60.5 | 78.4 $\Rightarrow$ 17.5 | 41.66              | 53.80             | 1.60                |
| Real                    | 84.6 $\Rightarrow$ 26.4 | 80.5 $\Rightarrow$ 30.8 | 90.6 $\Rightarrow$ 89.8 | 80.0 $\Rightarrow$ 10.8 | 52.29              | 59.03             | 0.80                |
| Sketch                  | 84.3 $\Rightarrow$ 83.0 | 79.1 $\Rightarrow$ 32.7 | 90.3 $\Rightarrow$ 9.7  | 80.7 $\Rightarrow$ 80.1 | 33.78              | 42.77             | 0.60                |
| Mean                    | /                       |                         |                         |                         | 41.59              | 50.48             | 1.00                |

Table 15: The accuracy (%) of target-specified CUTI-Domain on Mini-DomainNet. The vertical/horizontal axis denotes the authorized/unauthorized domain. In each task, the left of ' $\Rightarrow$ ' shows the test accuracy of SL-CLIP on the unauthorized domain, while the right side presents the accuracy of CUTI-Domain.

| Authorized/Unauthorized | Clipart                 | Painting                | Real                    | Sketch                  | $W_{u-a} \uparrow$ | $Drop_u \uparrow$ | $Drop_a \downarrow$ |
|-------------------------|-------------------------|-------------------------|-------------------------|-------------------------|--------------------|-------------------|---------------------|
| Clipart                 | 85.1 $\Rightarrow$ 84.9 | 79.8 $\Rightarrow$ 22.7 | 89.8 $\Rightarrow$ 23.7 | 78.7 $\Rightarrow$ 23.7 | 50.26              | 59.40             | 0.20                |
| Painting                | 83.8 $\Rightarrow$ 17.9 | 81.4 $\Rightarrow$ 76.1 | 89.1 $\Rightarrow$ 15.6 | 78.4 $\Rightarrow$ 17.1 | 46.88              | 66.90             | 5.30                |
| Real                    | 84.6 $\Rightarrow$ 24.9 | 80.5 $\Rightarrow$ 23.8 | 90.6 $\Rightarrow$ 89.5 | 80.0 $\Rightarrow$ 9.5  | 54.77              | 62.30             | 1.10                |
| Sketch                  | 84.3 $\Rightarrow$ 24.0 | 79.1 $\Rightarrow$ 25.2 | 90.3 $\Rightarrow$ 10.8 | 80.7 $\Rightarrow$ 80.0 | 51.09              | 64.57             | 0.70                |
| Mean                    | /                       |                         |                         |                         | 50.75              | 63.29             | 2.20                |

Table 16: The accuracy (%) of target-specified CUPI-Domain on Mini-DomainNet. The vertical/horizontal axis denotes the authorized/unauthorized domain. In each task, the left of '⇒' shows the test accuracy of SL-CLIP on the unauthorized domain, while the right side presents the accuracy of CUPI-Domain..

| Authorized/Unauthorized | Clipart     | Painting    | Real        | Sketch      | $W_{u-a} \uparrow$ | $Drop_u \uparrow$ | $Drop_a \downarrow$ |
|-------------------------|-------------|-------------|-------------|-------------|--------------------|-------------------|---------------------|
| Clipart                 | 85.1 ⇒ 84.9 | 79.8 ⇒ 20.8 | 89.8 ⇒ 21.4 | 78.7 ⇒ 19.9 | 52.52              | 62.07             | 0.20                |
| Painting                | 83.8 ⇒ 16.7 | 81.4 ⇒ 78.3 | 89.1 ⇒ 13.7 | 78.4 ⇒ 16.9 | 50.82              | 68.00             | 3.10                |
| Real                    | 84.6 ⇒ 25.1 | 80.5 ⇒ 20.7 | 90.6 ⇒ 89.7 | 80.0 ⇒ 8.9  | 56.12              | 63.47             | 0.90                |
| Sketch                  | 84.3 ⇒ 22.4 | 79.1 ⇒ 23.7 | 90.3 ⇒ 9.4  | 80.7 ⇒ 80.3 | 52.73              | 66.07             | 0.40                |
| Mean                    | /           |             |             |             | 53.05              | 64.90             | 1.40                |

Table 17: The accuracy (%) of target-specified HNTL on Mini-DomainNet. The vertical/horizontal axis denotes the authorized/unauthorized domain. In each task, the left of '⇒' shows the test accuracy of SL-CLIP on the unauthorized domain, while the right side presents the accuracy of HNTL.

| Authorized/Unauthorized | Clipart     | Painting    | Real        | Sketch      | $W_{u-a} \uparrow$ | $Drop_u \uparrow$ | $Drop_a \downarrow$ |
|-------------------------|-------------|-------------|-------------|-------------|--------------------|-------------------|---------------------|
| Clipart                 | 85.1 ⇒ 59.6 | 79.8 ⇒ 7.2  | 89.8 ⇒ 11.2 | 78.7 ⇒ 5.3  | 29.42              | 74.87             | 25.50               |
| Painting                | 83.8 ⇒ 6.1  | 81.4 ⇒ 63.3 | 89.1 ⇒ 18.3 | 78.4 ⇒ 3.6  | 35.66              | 74.43             | 18.10               |
| Real                    | 84.6 ⇒ 12.8 | 80.5 ⇒ 19.9 | 90.6 ⇒ 84.1 | 80.0 ⇒ 6.6  | 52.23              | 68.60             | 6.50                |
| Sketch                  | 84.3 ⇒ 4.9  | 79.1 ⇒ 3.6  | 90.3 ⇒ 6.3  | 80.7 ⇒ 42.0 | 17.19              | 79.63             | 38.70               |
| Mean                    | /           |             |             |             | 33.62              | 74.38             | 16.70               |

Table 18: The accuracy (%) of target-specified SOPHON on Mini-DomainNet. The vertical/horizontal axis denotes the authorized/unauthorized domain. In each task, the left of '⇒' shows the test accuracy of SL-CLIP on the unauthorized domain, while the right side presents the accuracy of SOPHON.

| Authorized/Unauthorized | Clipart     | Painting    | Real        | Sketch      | $W_{u-a} \uparrow$ | $Drop_u \uparrow$ | $Drop_a \downarrow$ |
|-------------------------|-------------|-------------|-------------|-------------|--------------------|-------------------|---------------------|
| Clipart                 | 85.1 ⇒ 78.9 | 79.8 ⇒ 25.2 | 89.8 ⇒ 40.0 | 78.7 ⇒ 25.7 | 36.55              | 52.47             | 6.17                |
| Painting                | 83.8 ⇒ 33.7 | 81.4 ⇒ 70.2 | 89.1 ⇒ 65.6 | 78.4 ⇒ 22.9 | 22.38              | 43.03             | 11.17               |
| Real                    | 84.6 ⇒ 36.7 | 80.5 ⇒ 42.7 | 90.6 ⇒ 81.4 | 80.0 ⇒ 18.7 | 32.40              | 49.00             | 9.20                |
| Sketch                  | 84.3 ⇒ 35.4 | 79.1 ⇒ 30.6 | 90.3 ⇒ 39.4 | 80.7 ⇒ 72.2 | 29.55              | 49.43             | 8.50                |
| Mean                    | /           |             |             |             | 30.22              | 48.48             | 8.84                |

Table 19: The accuracy (%) of target-specified IP-CLIP on Mini-DomainNet. The vertical/horizontal axis denotes the authorized/unauthorized domain. In each task, the left of '⇒' shows the test accuracy of SL-CLIP on the unauthorized domain, while the right side presents the accuracy of IP-CLIP.

| Authorized/Unauthorized | Clipart     | Painting    | Real        | Sketch      | $W_{u-a} \uparrow$ | $Drop_u \uparrow$ | $Drop_a \downarrow$ |
|-------------------------|-------------|-------------|-------------|-------------|--------------------|-------------------|---------------------|
| Clipart                 | 85.1 ⇒ 84.8 | 79.8 ⇒ 18.1 | 89.8 ⇒ 24.8 | 78.7 ⇒ 22.4 | 51.47              | 61.00             | 0.30                |
| Painting                | 83.8 ⇒ 9.2  | 81.4 ⇒ 80.9 | 89.1 ⇒ 26.5 | 78.4 ⇒ 14.4 | 53.85              | 67.07             | 0.50                |
| Real                    | 84.6 ⇒ 21.9 | 80.5 ⇒ 21.4 | 90.6 ⇒ 90.4 | 80.0 ⇒ 6.0  | 58.82              | 65.27             | 0.20                |
| Sketch                  | 84.3 ⇒ 23.2 | 79.1 ⇒ 15.6 | 90.3 ⇒ 9.2  | 80.7 ⇒ 80.2 | 54.59              | 68.57             | 0.50                |
| Mean                    | /           |             |             |             | 54.68              | 65.48             | 0.33                |

Table 20: The accuracy (%) of target-specified AoD-IP on Mini-DomainNet. The vertical/horizontal axis denotes the authorized/unauthorized domain. In each task, the left of '⇒' shows the test accuracy of SL-CLIP on the unauthorized domain, while the right side presents the accuracy of AoD-IP.

| Authorized/Unauthorized | Clipart     | Painting    | Real        | Sketch      | $W_{u-a} \uparrow$ | $Drop_u \uparrow$ | $Drop_a \downarrow$ |
|-------------------------|-------------|-------------|-------------|-------------|--------------------|-------------------|---------------------|
| Clipart                 | 85.1 ⇒ 85.1 | 79.8 ⇒ 12.3 | 89.8 ⇒ 16.3 | 78.7 ⇒ 17.0 | 57.47              | 67.58             | 0.02                |
| Painting                | 83.8 ⇒ 10.4 | 81.4 ⇒ 81.0 | 89.1 ⇒ 17.0 | 78.4 ⇒ 9.1  | 57.60              | 71.59             | 0.44                |
| Real                    | 84.6 ⇒ 14.6 | 80.5 ⇒ 14.1 | 90.6 ⇒ 90.4 | 80.0 ⇒ 10.7 | 61.76              | 68.58             | 0.23                |
| Sketch                  | 84.3 ⇒ 15.9 | 79.1 ⇒ 11.2 | 90.3 ⇒ 12.3 | 80.7 ⇒ 80.3 | 57.12              | 71.46             | 0.36                |
| Mean                    | /           |             |             |             | 58.49              | 69.80             | 0.26                |

Table 21: The detailed results of authorization application AoD-IP on Office-31.

| $X_a$   | $A_a^{ip} \rightarrow A_u^{ip}$ | $X_{e1}$ | $A_{e1}^{ip} \rightarrow A_u^{ip}$ | $X_{e2}$ | $A_{e2}^{ip} \rightarrow A_u^{ip}$ | $R_a / R_e / R_u$   |
|---------|---------------------------------|----------|------------------------------------|----------|------------------------------------|---------------------|
| Amazon† | 68.1 → 4.3 / 5.1 / 4.2          | Dslr†    | 97.7 → 20.6 / 1.2 / 0.3            | Webcam†  | 94.7 → 28.6 / 3.2 / 9.8            | 91.5 / 94.8 / 89.4  |
| Dslr†   | 97.8 → 22.5 / 1.3 / 0.2         | Amazon†  | 67.8 → 3.1 / 2.5 / 1.6             | Webcam†  | 91.9 → 25.4 / 0.8 / 2.4            | 100.0 / 98.5 / 92.3 |
| Webcam† | 92.0 → 25.8 / 1.2 / 2.4         | Amazon†  | 68.5 → 0.8 / 1.3 / 0.6             | Dslr†    | 97.2 → 22.1 / 1.0 / 1.3            | 96.0 / 96.4 / 93.0  |

Table 22: The detailed results of authorization application AoD-IP on Mini-DomainNet.

| $X_a$ | $A_a^{ip} \rightarrow A_u^{ip}$ | $X_{e1}$ | $A_{e1}^{ip} \rightarrow A_u^{ip}$ | $X_{e2}$ | $A_{e2}^{ip} \rightarrow A_u^{ip}$ | $X_{e3}$ | $A_{e3}^{ip} \rightarrow A_u^{ip}$ | $R_a / R_e / R_u$    |
|-------|---------------------------------|----------|------------------------------------|----------|------------------------------------|----------|------------------------------------|----------------------|
| Cl†   | 77.5 → 4.4 / 4.4 / 2.9 / 16.8   | Pa†      | 72.4 → 4.0 / 2.4 / 3.8 / 12.4      | Re†      | 83.4 → 1.9 / 1.7 / 1.6 / 11.6      | Sk†      | 76.1 → 0.8 / 1.0 / 1.6 / 4.0       | 100.0 / 99.9 / 92.5  |
| Pa†   | 70.0 → 6.7 / 7.9 / 4.5 / 13.0   | Cl†      | 77.9 → 2.9 / 1.6 / 2.9 / 20.0      | Re†      | 83.8 → 5.7 / 4.6 / 4.6 / 13.5      | Sk†      | 77.9 → 2.1 / 1.4 / 1.7 / 9.0       | 100.0 / 100.0 / 91.9 |
| Re†   | 83.2 → 5.4 / 2.4 / 1.9 / 13.0   | Cl†      | 77.3 → 1.6 / 1.0 / 1.4 / 4.4       | Pa†      | 72.8 → 5.1 / 2.7 / 3.8 / 13.3      | Sk†      | 76.0 → 1.3 / 0.5 / 1.0 / 2.2       | 100.0 / 99.5 / 93.8  |
| Sk†   | 75.1 → 3.5 / 1.3 / 3.8 / 5.9    | Cl†      | 78.9 → 2.4 / 1.4 / 3.8 / 7.5       | Pa†      | 71.9 → 2.5 / 1.1 / 3.7 / 8.4       | Re†      | 84.2 → 1.6 / 0.5 / 0.8 / 3.8       | 99.9 / 99.8 / 95.3   |

Table 23: The results of authorization application NTL on Office-31.

| Authorized/Test | Amazon | Dslr | Webcam | $D_{u-a} \uparrow$ | $A_u \downarrow$ | $A_a \uparrow$ |
|-----------------|--------|------|--------|--------------------|------------------|----------------|
| Amazon†         | 57.5   | 13.8 | 41.0   | 15.67              | 37.43            | 62.50          |
| Dslr†           | 78.7   | 18.5 | 54.3   | 39.25              | 50.50            | 92.80          |
| Webcam†         | 31.8   | 17.3 | 14.8   | 54.59              | 21.30            | 85.30          |
| Mean            | /      |      |        | 36.50              | 36.41            | 80.20          |

Table 24: The results of authorization application CUTI-Domain on Office-31.

| Authorized/Test  | Amazon | Dslr | Webcam | $D_{u-a}$ $\uparrow$ | $A_u$ $\downarrow$ | $A_a$ $\uparrow$ |
|------------------|--------|------|--------|----------------------|--------------------|------------------|
| Amazon $\dagger$ | 36.0   | 7.5  | 19.0   | 29.26                | 20.83              | 65.50            |
| Dslr $\dagger$   | 74.0   | 6.3  | 29.3   | 54.47                | 36.53              | 94.30            |
| Webcam $\dagger$ | 57.0   | 12.5 | 22.3   | 40.56                | 30.60              | 80.80            |
| Mean             | /      |      |        | 41.43                | 29.32              | 80.20            |

Table 25: The results of authorization application CUPI-Domain on Office-31.

| Authorized/Test  | Amazon | Dslr | Webcam | $D_{u-a}$ $\uparrow$ | $A_u$ $\downarrow$ | $A_a$ $\uparrow$ |
|------------------|--------|------|--------|----------------------|--------------------|------------------|
| Amazon $\dagger$ | 25.1   | 7.2  | 18.5   | 31.51                | 16.92              | 65.23            |
| Dslr $\dagger$   | 70.1   | 6.2  | 23.6   | 58.62                | 33.30              | 95.00            |
| Webcam $\dagger$ | 45.9   | 12.3 | 18.8   | 49.70                | 25.68              | 84.50            |
| Mean             | /      |      |        | 46.61                | 25.30              | 81.58            |

Table 26: The results of authorization application HNTL on Office-31.

| Authorized/Test  | Amazon | Dslr  | Webcam | $D_{u-a}$ $\uparrow$ | $A_u$ $\downarrow$ | $A_a$ $\uparrow$ |
|------------------|--------|-------|--------|----------------------|--------------------|------------------|
| Amazon $\dagger$ | 6.30   | 7.80  | 3.10   | 5.55                 | 5.73               | 26.60            |
| Dslr $\dagger$   | 46.90  | 6.30  | 10.90  | 73.19                | 21.37              | 96.90            |
| Webcam $\dagger$ | 34.40  | 15.60 | 6.30   | 78.36                | 18.77              | 98.40            |
| Mean             | /      |       |        | 52.37                | 15.29              | 73.97            |

Table 27: The results of authorization application SOPHON on Office-31.

| Authorized/Test  | Amazon | Dslr  | Webcam | $D_{u-a}$ $\uparrow$ | $A_u$ $\downarrow$ | $A_a$ $\uparrow$ |
|------------------|--------|-------|--------|----------------------|--------------------|------------------|
| Amazon $\dagger$ | 11.20  | 7.50  | 10.00  | 39.11                | 9.57               | 67.50            |
| Dslr $\dagger$   | 7.50   | 10.00 | 12.50  | 85.31                | 10.00              | 97.50            |
| Webcam $\dagger$ | 12.50  | 11.20 | 13.50  | 74.09                | 12.40              | 92.50            |
| Mean             | /      |       |        | 66.17                | 10.66              | 85.83            |

Table 28: The results of authorization application IP-CLIP on Office-31.

| Authorized/Test  | Amazon | Dslr | Webcam | $D_{u-a}$ $\uparrow$ | $A_u$ $\downarrow$ | $A_a$ $\uparrow$ |
|------------------|--------|------|--------|----------------------|--------------------|------------------|
| Amazon $\dagger$ | 4.5    | 3.3  | 2.8    | 37.46                | 3.53               | 63.00            |
| Dslr $\dagger$   | 27.3   | 1.5  | 0.5    | 82.42                | 9.77               | 95.80            |
| Webcam $\dagger$ | 31.0   | 4.3  | 11.3   | 56.45                | 15.53              | 83.30            |
| Mean             | /      |      |        | 58.78                | 9.61               | 80.70            |

Table 29: The results of authorization application AoD-IP on Office-31.

| Authorized/Test  | Amazon | Dslr | Webcam | $D_{u-a}$ $\uparrow$ | $A_u$ $\downarrow$ | $A_a$ $\uparrow$ |
|------------------|--------|------|--------|----------------------|--------------------|------------------|
| Amazon $\dagger$ | 2.7    | 3.0  | 2.1    | 44.64                | 2.61               | 68.13            |
| Dslr $\dagger$   | 21.7   | 1.2  | 0.6    | 87.55                | 7.83               | 97.57            |
| Webcam $\dagger$ | 26.6   | 1.7  | 4.9    | 75.96                | 11.07              | 92.87            |
| Mean             | /      |      |        | 69.39                | 7.17               | 86.19            |

Table 30: The results of authorization application NTL on Office-Home-65.

| Authorized/Test      | Art  | Clipart | Product | Real-World | $D_{u-a}$ $\uparrow$ | $A_u$ $\downarrow$ | $A_a$ $\uparrow$ |
|----------------------|------|---------|---------|------------|----------------------|--------------------|------------------|
| Art $\dagger$        | 21.0 | 14.3    | 17.0    | 29.5       | 49.47                | 20.45              | 81.30            |
| Clipart $\dagger$    | 21.0 | 13.0    | 45.0    | 31.8       | 9.74                 | 27.70              | 48.00            |
| Product $\dagger$    | 21.3 | 27.8    | 36.8    | 24.0       | 44.44                | 27.48              | 81.80            |
| Real-World $\dagger$ | 10.3 | 22.5    | 27.5    | 16.5       | 51.50                | 19.20              | 82.00            |
| Mean                 | /    |         |         |            | 38.79                | 23.71              | 73.28            |

Table 31: The results of authorization application CUTI-Domain on Office-Home-65.

| Authorized/Test      | Art  | Clipart | Product | Real-World | $D_{u-a}$ $\uparrow$ | $A_u$ $\downarrow$ | $A_a$ $\uparrow$ |
|----------------------|------|---------|---------|------------|----------------------|--------------------|------------------|
| Art $\dagger$        | 4.5  | 5.0     | 21.0    | 11.0       | 54.95                | 10.38              | 79.50            |
| Clipart $\dagger$    | 11.0 | 16.0    | 36.5    | 20.0       | 16.86                | 20.88              | 52.80            |
| Product $\dagger$    | 18.0 | 33.5    | 61.0    | 29.0       | 39.53                | 35.38              | 83.00            |
| Real-World $\dagger$ | 7.5  | 3.5     | 10.8    | 9.5        | 62.87                | 7.83               | 83.30            |
| Mean                 | /    |         |         |            | 43.55                | 18.61              | 74.65            |

Table 32: The results of authorization application CUPI-Domain on Office-Home-65.

| Authorized/Test      | Art  | Clipart | Product | Real-World | $D_{u-a}$ $\uparrow$ | $A_u$ $\downarrow$ | $A_a$ $\uparrow$ |
|----------------------|------|---------|---------|------------|----------------------|--------------------|------------------|
| Art $\dagger$        | 4.1  | 5.2     | 15.1    | 9.2        | 56.53                | 8.39               | 79.50            |
| Clipart $\dagger$    | 8.3  | 13.4    | 25.5    | 18.5       | 23.03                | 16.43              | 56.90            |
| Product $\dagger$    | 15.1 | 21.7    | 56.8    | 27.7       | 44.41                | 30.31              | 83.50            |
| Real-World $\dagger$ | 5.3  | 3.5     | 8.6     | 8.8        | 66.03                | 6.55               | 84.60            |
| Mean                 | /    |         |         |            | 47.50                | 15.42              | 76.13            |

Table 33: The results of authorization application HNTL on Office-Home-65.

| Authorized/Test      | Art | Clipart | Product | Real-World | $D_{u-a}$ $\uparrow$ | $A_u$ $\downarrow$ | $A_a$ $\uparrow$ |
|----------------------|-----|---------|---------|------------|----------------------|--------------------|------------------|
| Art $\dagger$        | 2.1 | 4.1     | 2.1     | 1.6        | 45.23                | 2.48               | 68.50            |
| Clipart $\dagger$    | 1.6 | 3.1     | 2.1     | 1.3        | 17.62                | 2.03               | 43.00            |
| Product $\dagger$    | 2.1 | 4.4     | 3.4     | 3.4        | 28.10                | 3.33               | 54.70            |
| Real-World $\dagger$ | 2.6 | 3.6     | 2.1     | 3.1        | 71.00                | 2.85               | 85.70            |
| Mean                 | /   |         |         |            | 40.49                | 2.67               | 62.98            |

Table 34: The results of authorization application SOPHON on Office-Home-65.

| Authorized/Test      | Art | Clipart | Product | Real-World | $D_{u-a}$ $\uparrow$ | $A_u$ $\downarrow$ | $A_a$ $\uparrow$ |
|----------------------|-----|---------|---------|------------|----------------------|--------------------|------------------|
| Art $\dagger$        | 3.8 | 4.8     | 7.2     | 9.2        | 50.14                | 6.25               | 74.00            |
| Clipart $\dagger$    | 5.5 | 16.2    | 13.0    | 15.2       | 26.61                | 12.48              | 58.20            |
| Product $\dagger$    | 2.0 | 3.8     | 10.2    | 4.5        | 64.64                | 5.13               | 83.00            |
| Real-World $\dagger$ | 4.8 | 4.0     | 13.2    | 10.0       | 59.44                | 8.00               | 81.20            |
| Mean                 | /   |         |         |            | 50.21                | 7.96               | 74.10            |

Table 35: The results of authorization application IP-CLIP on Office-Home-65.

| Authorized/Test | Art | Clipart | Product | Real-World | $D_{u-a}$ $\uparrow$ | $A_u$ $\downarrow$ | $A_a$ $\uparrow$ |
|-----------------|-----|---------|---------|------------|----------------------|--------------------|------------------|
| Art             | 1.5 | 3.3     | 7.8     | 3.0        | 60.12                | 3.88               | 79.50            |
| Clipart         | 4.3 | 5.3     | 22.5    | 9.8        | 26.52                | 10.48              | 57.00            |
| Product         | 5.8 | 9.3     | 12.0    | 6.5        | 57.74                | 8.40               | 80.30            |
| Real-World      | 2.3 | 4.0     | 8.5     | 6.0        | 71.17                | 5.20               | 87.00            |
| Mean            | /   |         |         |            | 53.89                | 6.99               | 75.95            |

Table 36: The results of authorization application AoD-IP on Office-Home-65.

| Authorized/Test | Art | Clipart | Product | Real-World | $D_{u-a} \uparrow$ | $A_u \downarrow$ | $A_a \uparrow$ |
|-----------------|-----|---------|---------|------------|--------------------|------------------|----------------|
| Art†            | 1.6 | 1.8     | 8.6     | 2.9        | 64.29              | 3.11             | 81.75          |
| Clipart†        | 2.8 | 4.9     | 15.7    | 5.9        | 28.95              | 5.28             | 56.51          |
| Product†        | 1.7 | 2.6     | 8.3     | 2.4        | 67.55              | 3.73             | 84.08          |
| Real-World†     | 1.7 | 2.6     | 6.0     | 2.3        | 73.77              | 3.14             | 87.48          |
| Mean            | /   |         |         |            | 58.64              | 3.82             | 77.45          |

Table 37: The results of authorization application NTL on Mini-DomainNet.

| Authorized/Test | Clipart | Painting | Real | Sketch | $D_{u-a} \uparrow$ | $A_u \downarrow$ | $A_a \uparrow$ |
|-----------------|---------|----------|------|--------|--------------------|------------------|----------------|
| Clipart†        | 13.5    | 8.7      | 12.1 | 35.9   | 38.45              | 17.54            | 71.40          |
| Painting†       | 26.2    | 15.1     | 14.3 | 41.1   | 32.78              | 24.18            | 70.60          |
| Real†           | 41.1    | 21.8     | 24.6 | 64.1   | 35.66              | 37.90            | 81.60          |
| Sketch†         | 16.5    | 7.8      | 11.3 | 30.6   | 38.66              | 16.55            | 71.00          |
| Mean            | /       |          |      |        | 36.39              | 24.04            | 73.65          |

Table 38: The results of authorization application CUTI-Domain on Mini-DomainNet.

| Authorized/Test | Clipart | Painting | Real | Sketch | $D_{u-a} \uparrow$ | $A_u \downarrow$ | $A_a \uparrow$ |
|-----------------|---------|----------|------|--------|--------------------|------------------|----------------|
| Clipart†        | 57.9    | 24.3     | 31.1 | 63.0   | 22.77              | 44.08            | 74.60          |
| Painting†       | 46.5    | 13.8     | 21.6 | 57.0   | 24.48              | 34.73            | 69.80          |
| Real†           | 42.4    | 17.9     | 21.9 | 57.1   | 33.56              | 34.83            | 77.90          |
| Sketch†         | 6.0     | 4.8      | 6.4  | 20.6   | 48.18              | 9.45             | 74.30          |
| Mean            | /       |          |      |        | 32.25              | 30.77            | 74.15          |

Table 39: The results of authorization application CUPI-Domain on Mini-DomainNet.

| Authorized/Test | Clipart | Painting | Real | Sketch | $D_{u-a} \uparrow$ | $A_u \downarrow$ | $A_a \uparrow$ |
|-----------------|---------|----------|------|--------|--------------------|------------------|----------------|
| Clipart†        | 30.5    | 18.9     | 26.7 | 40.7   | 34.35              | 29.21            | 75.00          |
| Painting†       | 30.7    | 12.1     | 16.7 | 18.2   | 35.64              | 19.43            | 70.20          |
| Real†           | 29.4    | 15.1     | 18.3 | 37.5   | 44.35              | 25.08            | 80.30          |
| Sketch†         | 6.5     | 4.2      | 5.8  | 15.6   | 50.24              | 8.02             | 75.00          |
| Mean            | /       |          |      |        | 41.14              | 20.43            | 75.13          |

Table 40: The results of authorization application HNTL on Mini-DomainNet.

| Authorized/Test    | Clipart | Painting | Real | Sketch | $D_{u-a}$ $\uparrow$ | $A_u$ $\downarrow$ | $A_a$ $\uparrow$ |
|--------------------|---------|----------|------|--------|----------------------|--------------------|------------------|
| Clipart $\dagger$  | 1.8     | 0.3      | 1.6  | 0.8    | 2.60                 | 1.11               | 16.70            |
| Painting $\dagger$ | 0.3     | 0.3      | 0.5  | 0.3    | 0.47                 | 0.35               | 7.00             |
| Real $\dagger$     | 1.0     | 0.5      | 1.0  | 1.3    | 2.05                 | 0.95               | 14.80            |
| Sketch $\dagger$   | 0.5     | 0.8      | 1.3  | 1.3    | 0.42                 | 0.98               | 7.00             |
| Mean               | /       |          |      |        | 1.39                 | 0.85               | 11.38            |

Table 41: The results of authorization application SOPHON on Mini-DomainNet.

| Authorized/Test    | Clipart | Painting | Real | Sketch | $D_{u-a}$ $\uparrow$ | $A_u$ $\downarrow$ | $A_a$ $\uparrow$ |
|--------------------|---------|----------|------|--------|----------------------|--------------------|------------------|
| Clipart $\dagger$  | 24.1    | 5.1      | 8.4  | 15.9   | 50.55                | 13.38              | 78.10            |
| Painting $\dagger$ | 16.0    | 10.6     | 11.4 | 14.6   | 41.59                | 13.15              | 71.40            |
| Real $\dagger$     | 11.7    | 6.3      | 9.4  | 4.4    | 60.10                | 7.95               | 81.60            |
| Sketch $\dagger$   | 10.0    | 5.9      | 7.0  | 3.7    | 45.15                | 6.65               | 70.60            |
| Mean               | /       |          |      |        | 49.35                | 10.28              | 75.43            |

Table 42: The results of authorization application IP-CLIP on Mini-DomainNet.

| Authorized/Test    | Clipart | Painting | Real | Sketch | $D_{u-a}$ $\uparrow$ | $A_u$ $\downarrow$ | $A_a$ $\uparrow$ |
|--------------------|---------|----------|------|--------|----------------------|--------------------|------------------|
| Clipart $\dagger$  | 4.6     | 5.1      | 4.8  | 14.9   | 50.88                | 7.35               | 75.10            |
| Painting $\dagger$ | 7.5     | 4.6      | 8.4  | 23.2   | 40.33                | 10.93              | 69.20            |
| Real $\dagger$     | 17.3    | 8.4      | 9.8  | 38.1   | 54.06                | 18.40              | 83.30            |
| Sketch $\dagger$   | 4.6     | 3.8      | 5.7  | 18.7   | 48.27                | 8.20               | 73.70            |
| Mean               | /       |          |      |        | 48.39                | 11.22              | 75.33            |

Table 43: The results of authorization application AoD-IP on Mini-DomainNet.

| Authorized/Test    | Clipart | Painting | Real | Sketch | $D_{u-a}$ $\uparrow$ | $A_u$ $\downarrow$ | $A_a$ $\uparrow$ |
|--------------------|---------|----------|------|--------|----------------------|--------------------|------------------|
| Clipart $\dagger$  | 2.8     | 2.1      | 2.8  | 12.2   | 56.82                | 4.96               | 77.90            |
| Painting $\dagger$ | 4.6     | 3.5      | 4.0  | 11.8   | 47.24                | 5.96               | 71.78            |
| Real $\dagger$     | 3.7     | 2.3      | 2.2  | 10.5   | 66.07                | 4.66               | 83.65            |
| Sketch $\dagger$   | 1.9     | 1.1      | 2.0  | 5.3    | 56.22                | 2.57               | 76.28            |
| Mean               | /       |          |      |        | 56.59                | 4.54               | 77.40            |

Table 44: Ablation study of target-specified AoD-IP 'Cl  $\rightarrow$  Pa'.

| $\lambda_1$           | 0.01                    | 0.05                    | 0.1                     | 0.2                     | 0.5                     | 1                       |
|-----------------------|-------------------------|-------------------------|-------------------------|-------------------------|-------------------------|-------------------------|
| $X_a \rightarrow X_u$ | 84.1 $\rightarrow$ 12.8 | 83.9 $\rightarrow$ 13.0 | 84.0 $\rightarrow$ 11.9 | 82.8 $\rightarrow$ 12.5 | 83.2 $\rightarrow$ 11.8 | 93.6 $\rightarrow$ 12.1 |

Table 45: A detailed description of the augmentation method applied in the target-free scenario.

| Augmentation | Augmentation                                       |
|--------------|----------------------------------------------------|
| AutoContrast | Applies automatic contrast adjustment to an image. |
| Brightness   | Adjusts the brightness of an image.                |
| Color        | Adjusts the color saturation of an image.          |
| Contrast     | Adjusts the contrast of an image.                  |
| Equalize     | Equalizes the histogram of an image.               |
| Identity     | Returns the image without any changes.             |
| Posterize    | Reduces the color depth of an image.               |
| Rotate       | Rotates an image by a random degree.               |
| Sharpness    | Adjusts the sharpness of an image.                 |
| ShearX       | Shears an image along the X-axis.                  |
| ShearY       | Shears an image along the Y-axis.                  |
| Solarize     | Inverts all pixel values above a threshold         |
| TranslateX   | Translates an image horizontally.                  |
| TranslateY   | Translates an image vertically                     |
